# Supplementary material for: Microstructural white matter alterations and hippocampal volumes are associated with cognitive deficits in craniopharyngioma
Source: PubMed Central journal article supplement (PMC5937918; doi:10.1530/eje-18-0081), 2018-03-16
Supplement: eje-178-577-t001.pdf [file eje-178-577-t001.pdf]

**Supplemental Table 1.** Description of vision and visual fields in 39\* patients with childhood onset craniopharyngioma who performed cognitive testing.

|                                                                                                   | With Hypothalamic lesion | Without Hypothalamic lesion | Total     |
|---------------------------------------------------------------------------------------------------|--------------------------|-----------------------------|-----------|
| Substantial visual field defects <b>and</b> vision $\leq 0.5$ on both eyes                        | 2                        | 2                           | 4         |
| Substantial visual field defects <b>and</b> vision $\leq 0.5$ on one eye, normal vision other eye | 7                        | 1                           | 8         |
| Substantial visual field defects <b>and</b> normal vision                                         | 1                        | 1                           | 2         |
| Minor visual field defects <b>or</b> normal visual fields <b>and</b> normal vision                | 12                       | 13                          | 25        |
| <b>Total</b>                                                                                      | <b>22</b>                | <b>17</b>                   | <b>39</b> |

\* The remaining 2 patients who performed cognitive testing were hard to categorize and were as follows:

1. Unilateral hemianopsia with vision  $<0.5$  on one eye, normal vision other eye (intact hypothalamus)
2. Normal visual fields with  $<0.5$  on one eye, normal vision other eye (hypothalamic lesion)

Substantial visual field defects: Decreased vision or blindness in at least one quarter of the visual field bilaterally
